# Supplementary material for: Advanced intestinal regulation improves bowel preparation quality in patients with constipation: A systematic review and network meta-analysis
Source: PubMed Central journal article supplement (PMC9904507; doi:10.3389/fphar.2022.964915), 2023-01-24
Supplement: DataSheet1.pdf [file DataSheet1.pdf]

supplement 3: Sensitivity analysis prove that all estimate effect maintained the stable in the process of single study deletion .

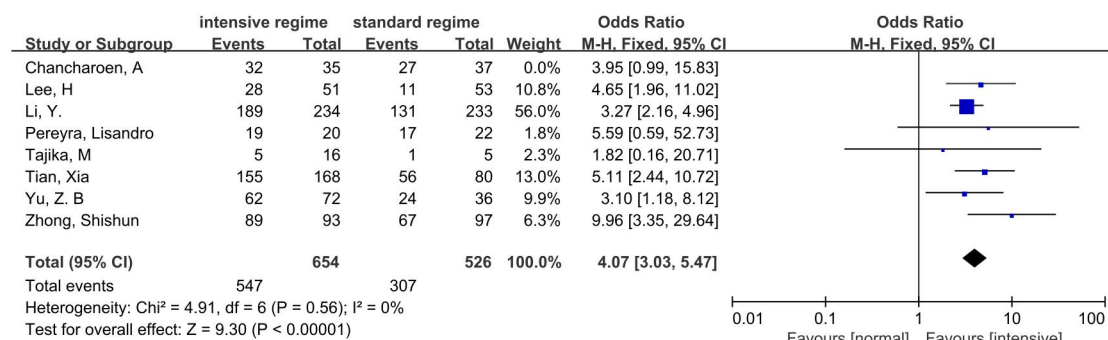

Figure 1. After removing the study of Chancharoen, A, the estimated effect for primary outcome was significantly higher in intensive regimen (OR 4.07, 95 % CI 3.03 to 5.47) .

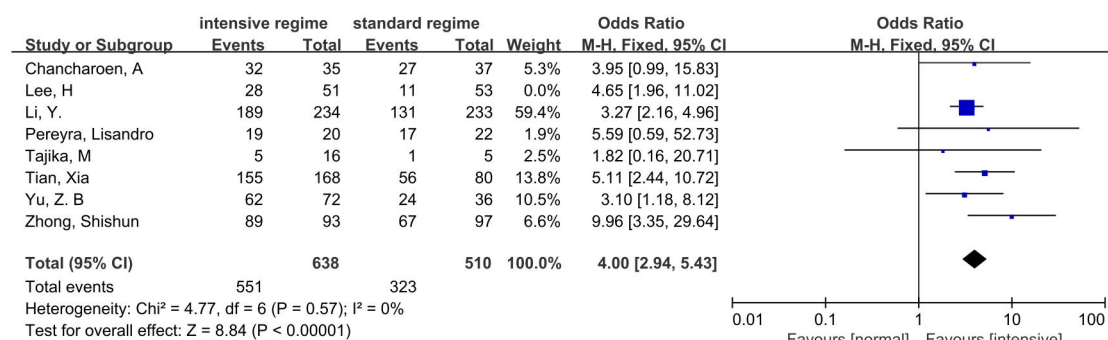

Figure 2. After removing the study of Lee, H, the estimated effect for primary outcome was significantly higher in intensive regimen (OR 4.00, 95 % CI 2.94 to 5.43) .

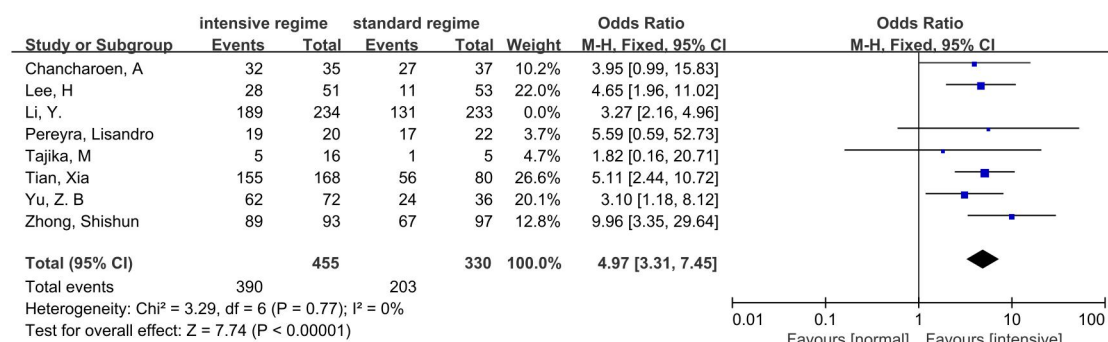

Figure 3. After removing the study of Li, Y, the estimated effect for primary outcome was significantly higher in intensive regimen (OR 4.97, 95 % CI 3.31 to 7.45) .

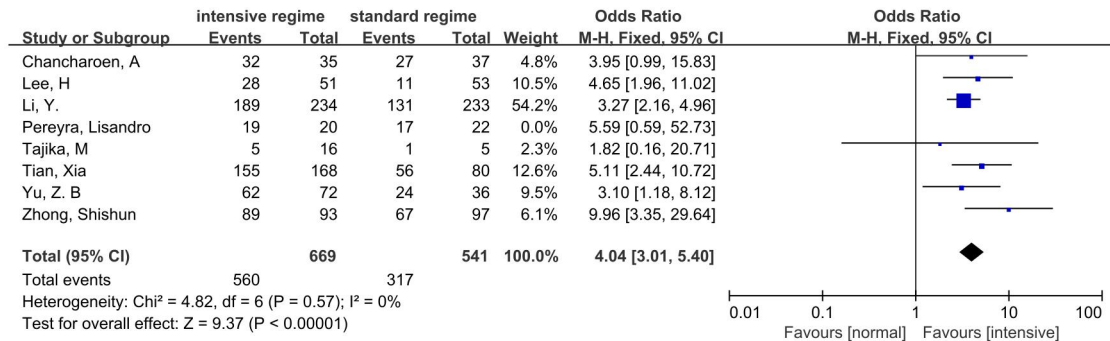

Figure 4. After removing the study of Pereyra, Lisandro, the estimated effect for primary outcome was significantly higher in intensive regimen (OR 4.04, 95 % CI 3.01 to 5.40) .

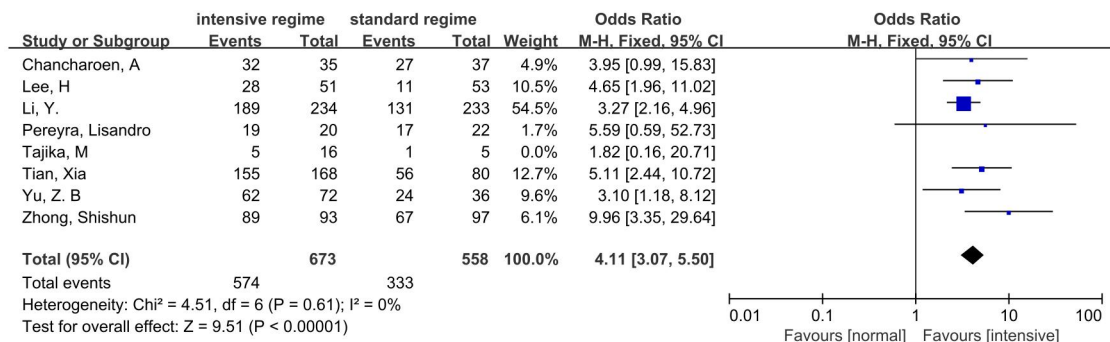

Figure 5. After removing the study of Tajika, M, the estimated effect for primary outcome was significantly higher in intensive regimen (OR 4.11, 95 % CI 3.07 to 5.50) .

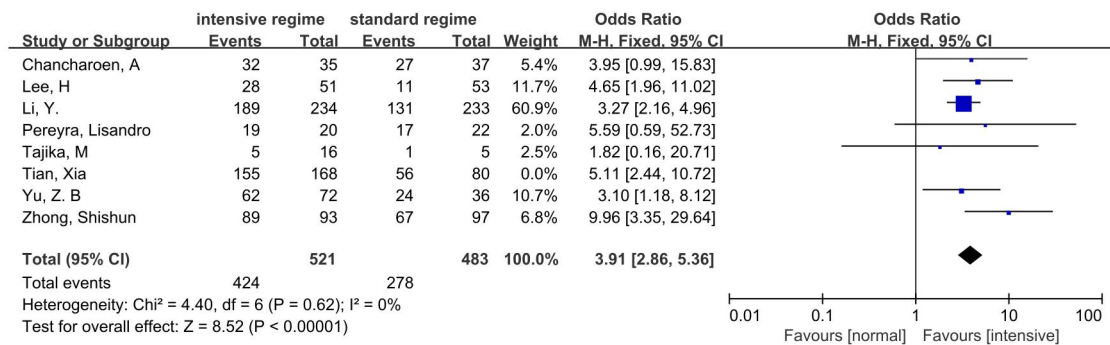

Figure 6. After removing the study of Tian, Xia, the estimated effect for primary outcome was significantly higher in intensive regimen (OR 3.91, 95 % CI 2.86 to 5.36) .

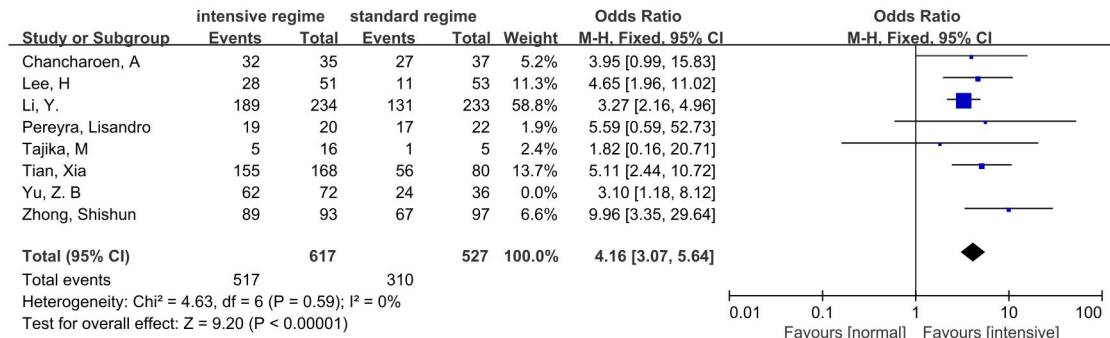

Figure 7. After removing the study of Yu, Z.B, the estimated effect for primary outcome was significantly higher in intensive regimen (OR 4.16, 95 % CI 3.07 to 5.64) .

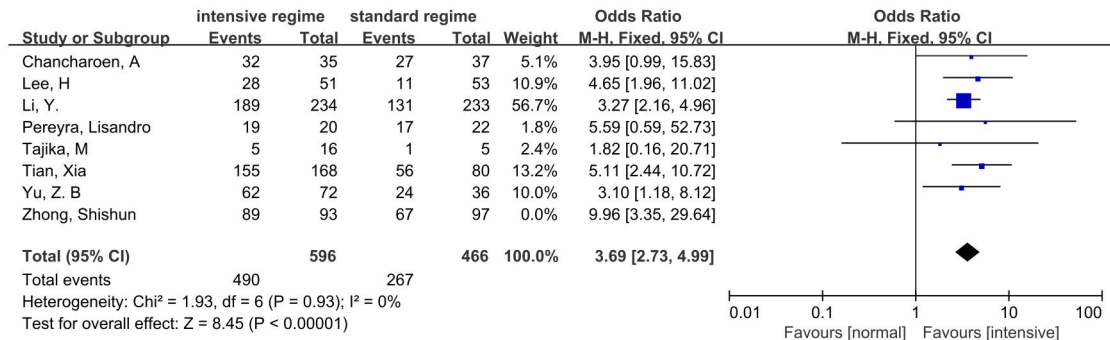

Figure 8. After removing the study of Zhong, Shishun, the estimated effect for primary outcome was significantly higher in intensive regimen (OR 3.69, 95 % CI 2.73 to 4.99) .
