# Supplementary material for: Advanced intestinal regulation improves bowel preparation quality in patients with constipation: A systematic review and network meta-analysis
Source: PubMed Central journal article supplement (PMC9904507; doi:10.3389/fphar.2022.964915), 2023-01-24
Supplement: DataSheet2.pdf [file DataSheet2.pdf]

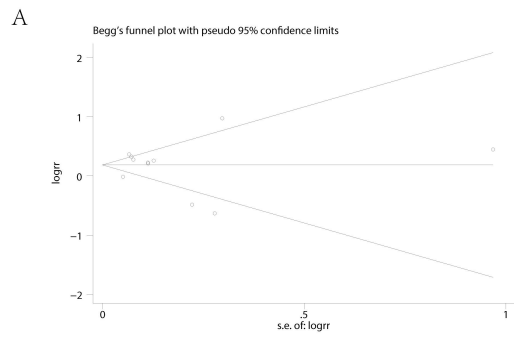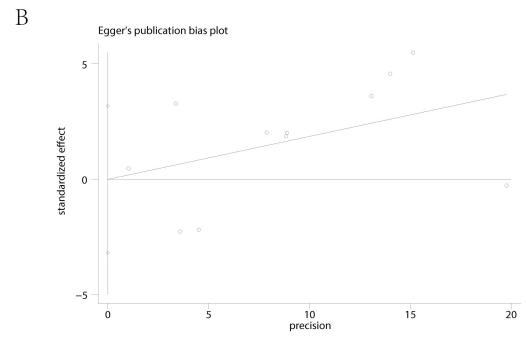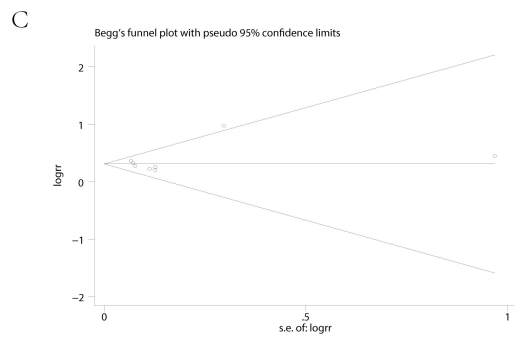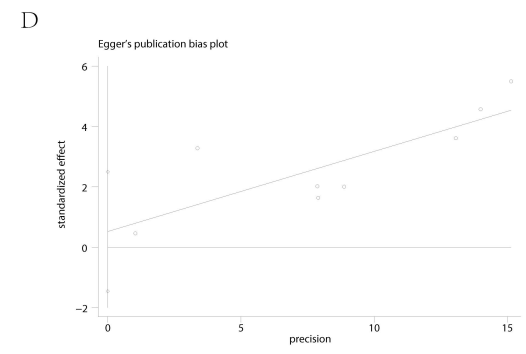

Supplement 4: figure of Begg's and Egger's test
