# Supplementary material for: Advanced intestinal regulation improves bowel preparation quality in patients with constipation: A systematic review and network meta-analysis
Source: PubMed Central journal article supplement (PMC9904507; doi:10.3389/fphar.2022.964915), 2023-01-24
Supplement: Table2.pdf [file Table2.pdf]

|                   | Random sequence generation (selection bias) | Allocation concealment (selection bias) | Blinding of participants and personnel (performance bias) | Blinding of outcome assessment (detection bias) | Incomplete outcome data (attrition bias) | Selective reporting (reporting bias) | Other bias |
|-------------------|---------------------------------------------|-----------------------------------------|-----------------------------------------------------------|-------------------------------------------------|------------------------------------------|--------------------------------------|------------|
| Arezzo, A         | ?                                           | ?                                       | -                                                         | +                                               | +                                        | +                                    | +          |
| Chancharoen, A    | +                                           | +                                       | ?                                                         | +                                               | +                                        | +                                    | +          |
| De Salvo, L       | ?                                           | ?                                       | -                                                         | ?                                               | +                                        | +                                    | +          |
| Lee, H            | +                                           | +                                       | ?                                                         | +                                               | +                                        | +                                    | +          |
| Li, Y.            | +                                           | +                                       | -                                                         | +                                               | +                                        | +                                    | +          |
| Parente, Fabrizio | +                                           | +                                       | -                                                         | +                                               | +                                        | +                                    | +          |
| Pereyra, Lisandro | +                                           | +                                       | ?                                                         | +                                               | +                                        | +                                    | +          |
| Tajika, M         | +                                           | +                                       | ?                                                         | +                                               | ?                                        | +                                    | +          |
| Tian, Xia         | ?                                           | ?                                       | -                                                         | ?                                               | +                                        | +                                    | ?          |
| Yu, Z. B          | +                                           | +                                       | -                                                         | ?                                               | ?                                        | ?                                    | +          |
| Zhong, Shishun    | +                                           | +                                       | -                                                         | ?                                               | +                                        | +                                    | +          |

Supplement2: Risk of bias in included studies
